# Supplementary material for: Measurement Strategies for the Classification of Edible Oils Using Low-Cost Miniaturised Portable NIR Instruments
Source: MDPI journal article supplement (doi:10.3390/foods10112856), 2021-11-18
Supplement: s1 [file s1]

# Measurement strategies for the classification of edible oils using low-cost miniaturised portable NIR instruments

Barbara Giussani, Alix Tatiana Escalante-Quiceno, Ricard Boqué and Jordi Riu

## Supplementary Materials

**Table S1.** Classification of different classes of olive oils applying LDA classification to SCiO and NeoSpectra data.

|                                                |                   | Precision | Accuracy | NPV  | FPR  | FNR  |
|------------------------------------------------|-------------------|-----------|----------|------|------|------|
| SCiO                                           | EVOO training set | 1         | 1        | 1    | 0    | 0    |
|                                                | POO training set  | 1         | 1        | 1    | 0    | 0    |
|                                                | ROO training set  | 1         | 1        | 1    | 0    | 0    |
|                                                | VOO training set  | 1         | 1        | 1    | 0    | 0    |
|                                                | EVOO test set     | 0.91      | 0.94     | 1    | 0.13 | 0    |
|                                                | POO test set      | 1         | 1        | 1    | 0    | 0    |
|                                                | ROO test set      | 1         | 0.94     | 0.93 | 0    | 0.20 |
|                                                | VOO test set      | 1         | 1        | 1    | 0    | 0    |
| NeoSpectra<br>method 1<br>(home-made<br>cells) | EVOO training set | 1         | 1        | 1    | 0    | 0    |
|                                                | POO training set  | 1         | 1        | 1    | 0    | 0    |
|                                                | ROO training set  | 1         | 1        | 1    | 0    | 0    |
|                                                | VOO training set  | 1         | 1        | 1    | 0    | 0    |
|                                                | EVOO test set     | 0.91      | 0.94     | 1    | 0.13 | 0    |
|                                                | POO test set      | 1         | 1        | 1    | 0    | 0    |
|                                                | ROO test set      | 1         | 0.89     | 0.87 | 0    | 0.40 |
|                                                | VOO test set      | 0.50      | 0.94     | 1    | 0.06 | 0    |
| NeoSpectra<br>method 2<br>(paper)              | EVOO training set | 1         | 1        | 1    | 0    | 0    |
|                                                | POO training set  | 1         | 1        | 1    | 0    | 0    |
|                                                | ROO training set  | 1         | 1        | 1    | 0    | 0    |
|                                                | VOO training set  | 1         | 1        | 1    | 0    | 0    |
|                                                | EVOO test set     | 0.67      | 0.61     | 0.56 | 0.38 | 0.40 |
|                                                | POO test set      | -         | 0.89     | 0.89 | 0.00 | 1.00 |
|                                                | ROO test set      | 0.50      | 0.72     | 0.79 | 0.15 | 0.60 |
|                                                | VOO test set      | 0.20      | 0.78     | 1    | 0.24 | 0    |

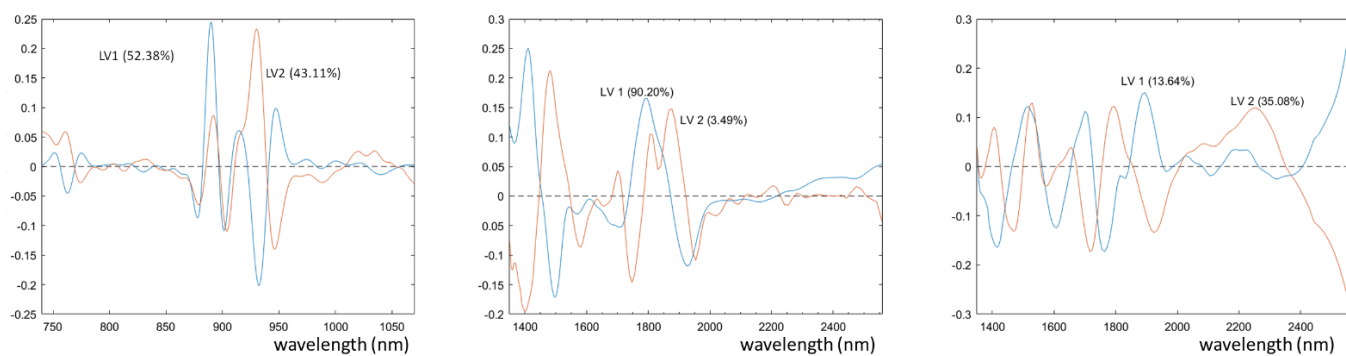

**Figure S1.** PLS-DA loadings for a) SCiO, b) NeoSpectra method 1 (home-made cells), c) NeoSpectra method 2 (paper).

For the sake of clarity, in the case of NeoSpectra only the loadings for the 2 first latent variables are shown in Figure S1.
